# Supplementary material for: Neutralization of Bacterial YoeBSpn Toxicity and Enhanced Plant Growth in Arabidopsis thaliana via Co-Expression of the Toxin-Antitoxin Genes
Source: Int J Mol Sci. 2016 Apr 20;17(4):321. doi: 10.3390/ijms17040321 (PMC4848878; doi:10.3390/ijms17040321)
Supplement: Supplementary file 1 [file ijms-17-00321-s001.pdf]

# Supplementary Material: Neutralization of YoeB<sub>Spm</sub> Toxicity and Enhanced Plant Growth in *Arabidopsis thaliana* via Co-Expression of Toxin-Antitoxin Genes

Fauziah Abu Bakar, Chew Chieng Yeo and Jennifer Ann Harikrishna

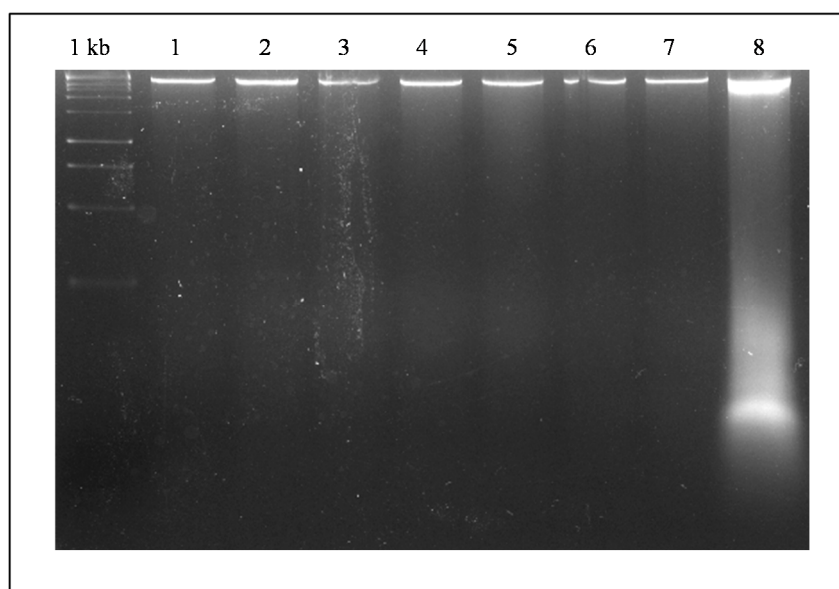

**Figure S1.** Laddering of nuclear DNA from transgenic *yoeB<sub>Spm</sub>-GFP*. Lane 1: Non-induced wild-type; 2: Non-induced *yefM<sub>Spm</sub>*; 3: Non-induced *yefM<sub>Spm</sub> × yoeB<sub>Spm</sub>-GFP* hybrid; 4: Non-induced *yoeB<sub>Spm</sub>-GFP*; 5: Induced wild-type; 6: Induced *yefM<sub>Spm</sub>*; 7: Induced *yefM<sub>Spm</sub> × yoeB<sub>Spm</sub>-GFP* hybrid; 8: Induced *yoeB<sub>Spm</sub>-GFP*; 1 kb: 1 kb DNA ladder (Fermentas).

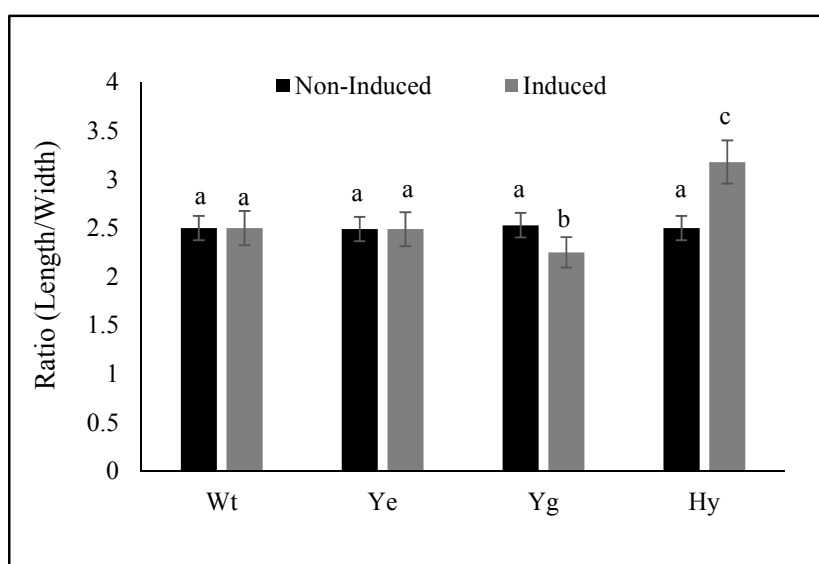

**Figure S2.** Ratio of length to width of leaf (7th position) of induced and non-induced plants. Wt: wild-type *A. thaliana*; Ye: transgenic *A. thaliana* (*yefM<sub>Spm</sub>*); Yg: transgenic *A. thaliana* (*yoeB<sub>Spm</sub>-GFP*); Hy: transgenic *A. thaliana* (*yefM<sub>Spm</sub> × yoeB<sub>Spm</sub>-GFP*) hybrid. Data are presented as the mean  $\pm$  standard deviation ( $n = 20$ ); significance values (with significant differences between samples indicated by the letters a, b and c) were determined by one-way ANOVA (Tukey used as the *post hoc* test with  $p < 0.05$ ).

**Table S1.** Possible binding sites for the YefM-YoeB<sub>Spn</sub>-GFP complex in the *Arabidopsis thaliana* genome based on the 27-nucleotides binding site for YefM-YoeB<sub>Spn</sub> in *S. pneumoniae* as determined by DNaseI footprinting by Chan *et al.* [18].

| Accession No.                    | Chromosome No. | Identities (Out of 27 Nucleotides) | Gene                                                                                       | Features                                                                               | Possible Molecular Function(s)                                                                                                                                                                          |
|----------------------------------|----------------|------------------------------------|--------------------------------------------------------------------------------------------|----------------------------------------------------------------------------------------|---------------------------------------------------------------------------------------------------------------------------------------------------------------------------------------------------------|
| GI/240256243<br>ref/NC_003075.7  | 4              | 21                                 | <i>ARPC5</i>                                                                               | Actin related protein 2/3 complex, subunit 5A                                          | Regulation of actin polymerization and together with an activating nucleation—promoter factor (NPF)                                                                                                     |
| GI/240255695<br>ref/NC_003074.8  | 3              | 20                                 | Representative gene model—At3g31051.1                                                      | Hypothetical protein                                                                   | Involved in transcription or purifying selection                                                                                                                                                        |
| GI/2402544121<br>ref/NC_003070.9 | 1              | 20                                 | <i>UBP13</i>                                                                               | Ubiquitin carboxyl terminal hydrolase related protein                                  | Cystein type peptidase activity; Ubiquitin—dependent protein catabolic process                                                                                                                          |
| GI/240256493<br>ref/NC_003076.8  | 5              | 19                                 | 1. MATE (Multidrug and toxic compound extrusion)<br>2. Representative gene model—At2g16870 | 1. MATE efflux family protein<br>2. TIR-NBS-LRR class disease resistance protein       | 1. Citrate exudation into the rhizosphere, drug transmembrane transporter activity.<br>2. ADP/ATP binding                                                                                               |
| GI/240256243<br>ref/NC_003075.7  | 4              | 19                                 | Representative gene model—At4g37095.1                                                      | Hypothetical protein                                                                   | Gene codes for small protein either involved in transcription or purifying selection                                                                                                                    |
| GI/240255695<br>ref/NC_003074.8  | 3              | 19                                 | <i>T21J18-100</i>                                                                          | Polynucleotide adenylyltransferase domain and RNA recognition motif containing protein | Nucleotide binding nucleotidyltransferase activity                                                                                                                                                      |
| GI/240254678<br>ref/NC_003071.7  | 2              | 19                                 | TT12/DTX14<br>Representative gene model—At3g59030                                          | MATE efflux family protein (F3L12.8)                                                   | Citrate exudation into the rhizosphere, drug transmembrane transporter activity                                                                                                                         |
| GI/240254678<br>ref/NC_003071.7  | 2              | 19                                 | TT12/DTX14<br>Representative gene model—At3g59030                                          | MATE efflux family protein                                                             | Citrate exudation into the rhizosphere, drug transmembrane transporter activity                                                                                                                         |
| GI/240254421<br>ref/NC_003070.9  | 1              | 19                                 | 1.Representative gene model—At1g34930<br>2. LAX3                                           | 1. Plant thionin family protein<br>2. Auxin influx carrier LAX3                        | 1. Cystein rich protein with toxic and antimicrobial properties involved in plant defense mechanism.<br>2. Promotes lateral root emergence and is involved in phototaxis arrangement of leaves and stem |
| GI/240254678<br>ref/NC_003071.7  | 2              | 18                                 | <i>APC2</i><br>Representative gene model—At2g04660.1                                       | Anaphase promoting complex subunit—2                                                   | A highly conserved ubiquitin protein ligase involved in cell cycle regulation and also promotes protein binding                                                                                         |
